# Supplementary material for: Evolutionary and Comparative Expression Analyses of TCP Transcription Factor Gene Family in Land Plants
Source: MDPI journal article supplement (doi:10.3390/ijms20143591), 2019-07-23
Supplement: s1 [file s1]

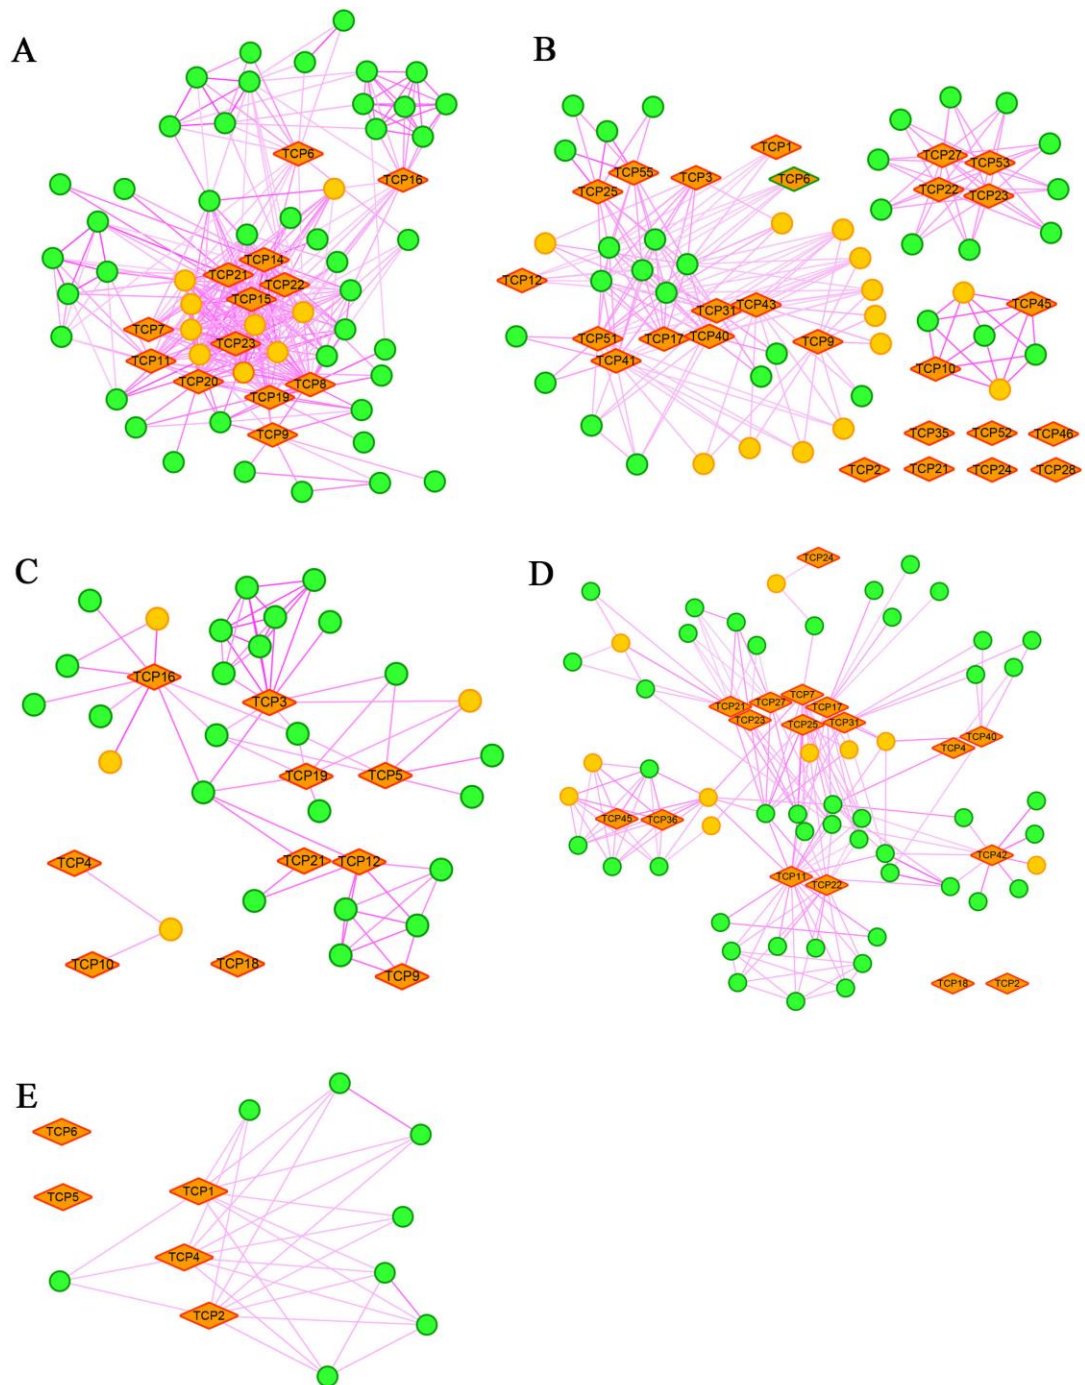

**Figure S4. Protein interaction networks of Class I TCP proteins in (A) *A. thaliana*, (B) *G. max*, (C) *O. sativa*, (D) *Z. mays* and (E) *P. patens* according to the STRING dataset. The Class I TCP proteins are in orange rhomb; the light orange circle represents other types of TCP proteins. Green circle represents non-TCP proteins .**
